# Supplementary material for: P2Y6 Receptor Potentiates Pro-Inflammatory Responses in Macrophages and Exhibits Differential Roles in Atherosclerotic Lesion Development
Source: PubMed Central journal article supplement (PMC4216081; doi:10.1371/journal.pone.0111385), 2014-10-31

# Supplemental Figure S2

## A P2Y receptor expression in mouse peritoneal macrophages

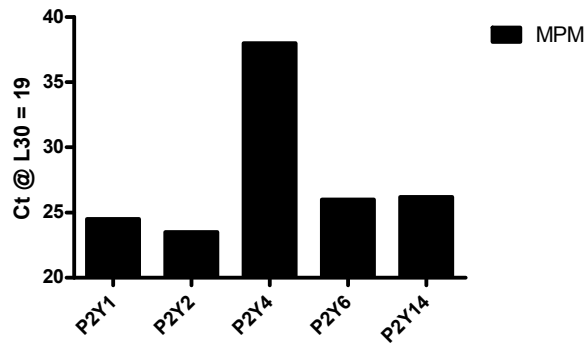

## B P2Y receptor expression in THP-1 cells

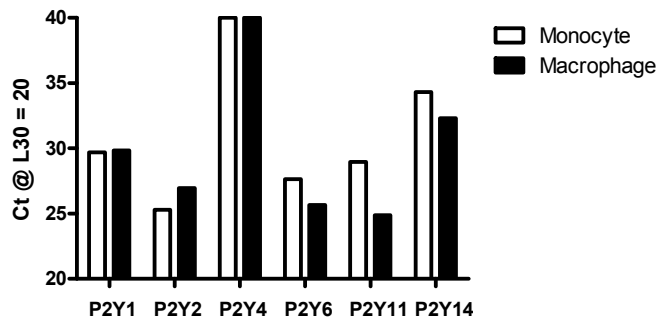

## C

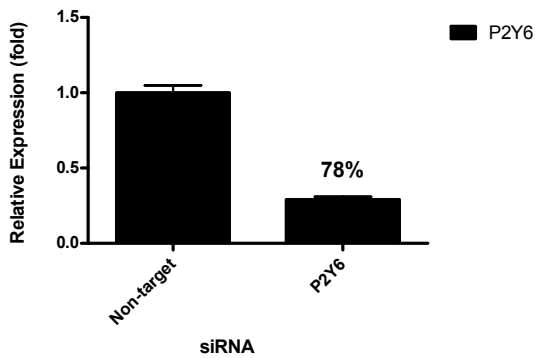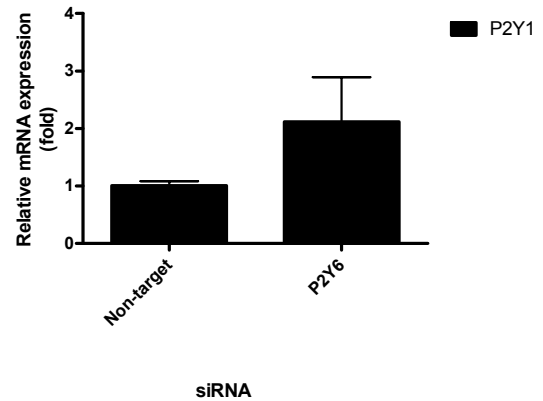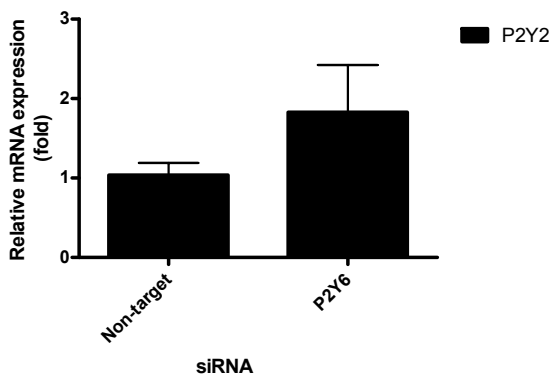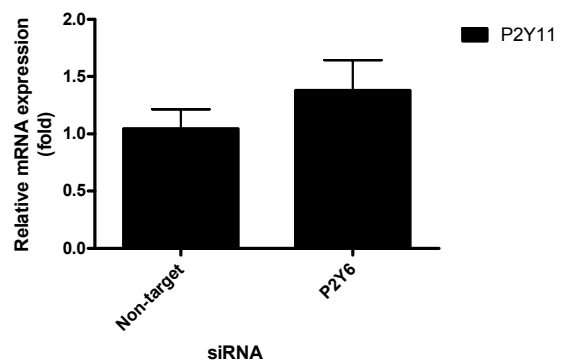

Supplement: pone.0111385.s002.pdf [file pone.0111385.s002.pdf]
