# Supplementary material for: P2Y6 Receptor Potentiates Pro-Inflammatory Responses in Macrophages and Exhibits Differential Roles in Atherosclerotic Lesion Development
Source: PubMed Central journal article supplement (PMC4216081; doi:10.1371/journal.pone.0111385), 2014-10-31
Supplement: pone.0111385.s003.pdf [file pone.0111385.s003.pdf]

# Supplemental Figure S3

## Immunology

### RESULTS

|                                                                          |                                     |
|--------------------------------------------------------------------------|-------------------------------------|
| OVA-Induced Allergic Pulmonary Inflammation.....                         | <u>↑ &amp; ↓ inflammatory cells</u> |
| LPS-Induced Pulmonary Inflammation.....                                  | No differences                      |
| SRBC-Delayed Type Hypersensitivity (DTH).....                            | <u>No differences</u>               |
| Thioglycollate-Induced Monocyte Infiltration.....                        | <u>No differences</u>               |
| <i>Ex Vivo</i> Cytokine Production by Monocytes Stimulated with LPS..... | No differences                      |
| Hematological Analysis of Peripheral Blood.....                          | No differences                      |
| FACS Analysis of Splenocytes.....                                        | No differences                      |
| Cytokine Production by CD4+ Cells.....                                   | No differences                      |
| B and CD4+ T Cell Proliferation <i>In Vitro</i> .....                    | No differences                      |
| Dextran Sulfate Sodium (DSS)-induced Colitis.....                        | <u>No differences</u>               |
| <i>In Vivo</i> LPS Challenge Without D-Galactosamine.....                | ↓ IL-1β & TNFα                      |

## Cardiovascular and Metabolism

|                                                                                                   |                        |
|---------------------------------------------------------------------------------------------------|------------------------|
| Blood Pressure and Heart Rate in the N-methyl-L-arginine (L-NMA) Induced Hypertension Model ..... | No differences         |
| The Response to the High-Fat Diet Challenge.....                                                  | No differences         |
| Individual Assays Included in the High Fat Diet Challenge.....                                    | No differences         |
| Body Weight Measurements.....                                                                     | No differences         |
| Body Composition by Dual-Energy X-ray Absorptiometry (DEXA).....                                  | No differences         |
| Oral Glucose Tolerance Test (OGTT).....                                                           | No differences         |
| Body Composition by Dual-Energy X-ray Absorptiometry (DEXA) Females.....                          | No differences         |
| Excised Bone DEXA.....                                                                            | <u>↑ bone density*</u> |
| Tail Bleeding Time.....                                                                           | No differences         |
