# Supplementary material for: P2Y6 Receptor Potentiates Pro-Inflammatory Responses in Macrophages and Exhibits Differential Roles in Atherosclerotic Lesion Development
Source: PubMed Central journal article supplement (PMC4216081; doi:10.1371/journal.pone.0111385), 2014-10-31

# Supplemental Figure S6

A

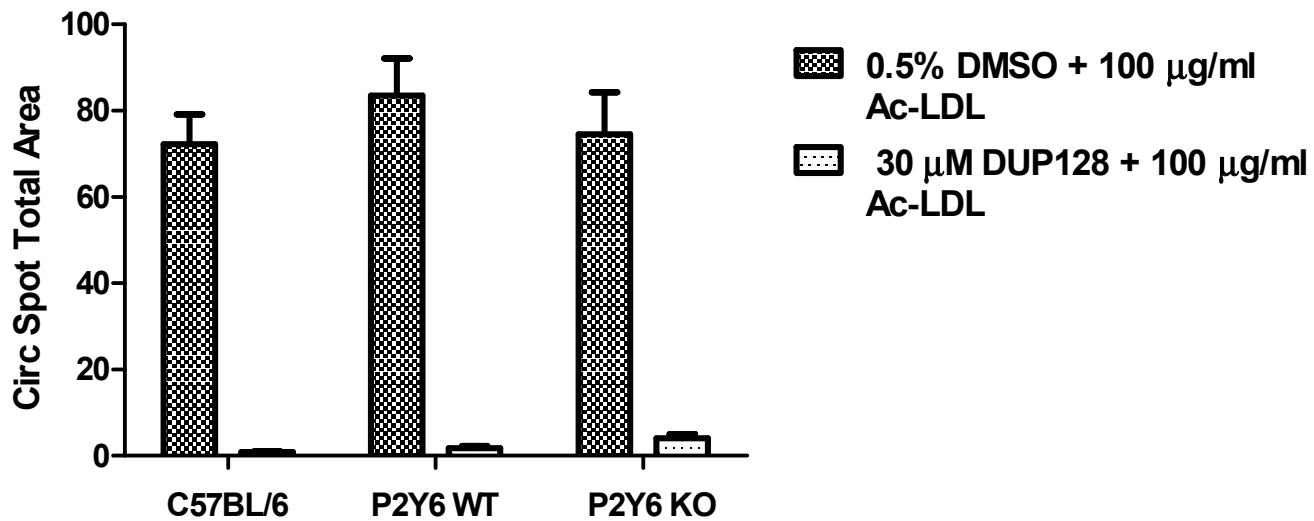

B

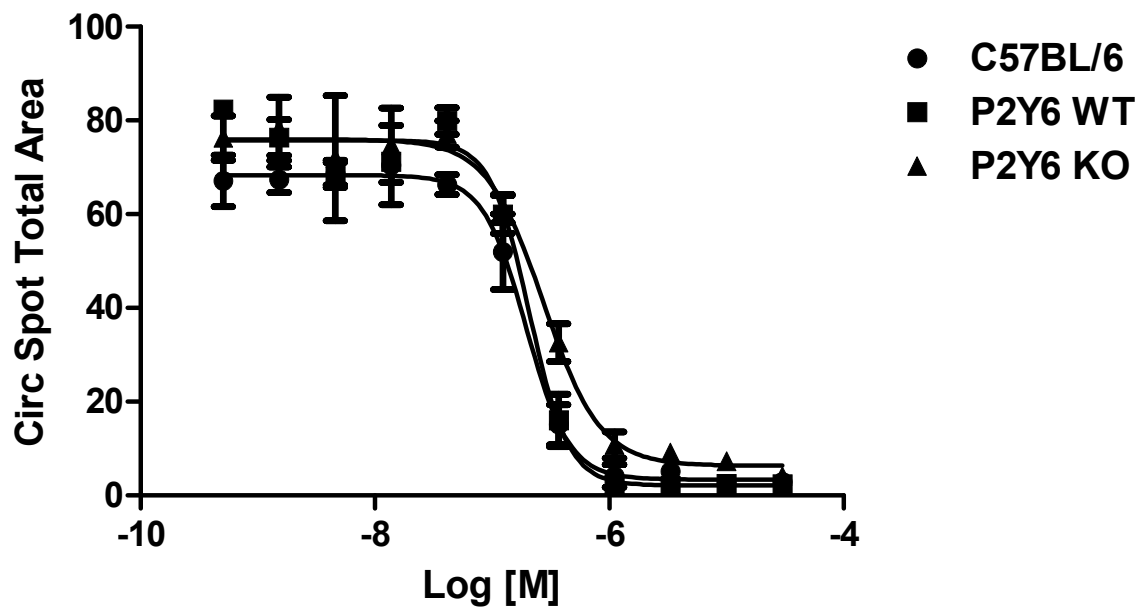

Supplement: pone.0111385.s006.pdf [file pone.0111385.s006.pdf]
